# Supplementary material for: Early onset hereditary neuronopathies: an update on non-5q motor neuron diseases
Source: PubMed Central journal article supplement — Brain. 2022 Nov 29;146(3):806–22. doi: 10.1093/brain/awac452 (PMC9976982; doi:10.1093/brain/awac452), 2022-11-29
Supplement: awac452_supplementary_data.pdf [file awac452_supplementary_data.pdf]

## SUPPLEMENTARY MATERIAL

**Supplemental Table 1. SMA, SMA-like phenotype and conditions in which neurogenic EMG changes are found in the context of a complex disorder**

| Gene                                        | Inheritance | Salient or peculiar features                                                                                                                                                                                                                                                                                      | Age of onset           | Disease                                                                               |
|---------------------------------------------|-------------|-------------------------------------------------------------------------------------------------------------------------------------------------------------------------------------------------------------------------------------------------------------------------------------------------------------------|------------------------|---------------------------------------------------------------------------------------|
| <b>SMA with severe congenital phenotype</b> |             |                                                                                                                                                                                                                                                                                                                   |                        |                                                                                       |
| <i>SMN1</i>                                 | AR          | Bell-shaped thorax and diaphragmatic breathing                                                                                                                                                                                                                                                                    | Birth - first months   | SMA type 0-1                                                                          |
| <i>UBE1</i>                                 | X-linked    | Proximal weakness, proximal and finger contractures, respiratory insufficiency, dysmorphic features, myopathic facies. Death in less than 2 years of age                                                                                                                                                          | Birth or infancy       | X-linked infantile SMA type 2                                                         |
| <i>SCO2</i>                                 | AR          | Like SMA type 1 with dilated cardiomyopathy, ptosis, impaired extraocular movements                                                                                                                                                                                                                               | Infantile              | SMA phenotype due to mitochondrial dysfunction                                        |
| <i>IGHMBP2</i>                              | AR          | Severe distal weakness. Diaphragmatic paralysis with sparing of intercostal muscles. Death or respiratory failure in less than 3 months. Occasionally, mild contractures of the knee and ankle.                                                                                                                   | Birth-2 months         | SMARD1                                                                                |
| <i>LAS1L</i>                                | X-Linked R  | Distal weakness at birth and early respiratory failure. Tongue fasciculations. Mild contractures of fingers and toes                                                                                                                                                                                              | Birth                  | SMARD2                                                                                |
| <i>RBM7</i>                                 | AR          | Cachexia, diffuse weakness, early respiratory impairment. No fasciculations. Tendon reflexes: Reduced                                                                                                                                                                                                             | 12 months              | Spinal motor neuropathy                                                               |
| <b>SMA + CNS manifestations</b>             |             |                                                                                                                                                                                                                                                                                                                   |                        |                                                                                       |
| <i>VRK1</i>                                 | AR          | Hypotonia, weakness, distal symmetric polyneuropathy, ataxia, nystagmus, contractures, microcephaly. Typical MRI findings.                                                                                                                                                                                        | Congenital to 6 months | SMA with pontocerebellar hypoplasia type 1 (PCH 1)                                    |
| <i>RARS2</i>                                | AR          | Delayed development, problems with movement, and intellectual disability. Typical MRI findings.                                                                                                                                                                                                                   | 1st year               | PCH 1                                                                                 |
| <i>EXOSC8</i>                               | AR          | Spinal motor neuron disease + Typical MRI findings.                                                                                                                                                                                                                                                               | Congenital             | PCH 1C                                                                                |
| <i>EXOSC3</i>                               | AR          | Progressive microcephaly, distal contractures, oculomotor apraxia. Respiratory involvement. Typical MRI findings.                                                                                                                                                                                                 | Congenital             | PCH 2                                                                                 |
| <i>TSEN54</i>                               | AR          | Severity depends on the form. Severe developmental delay. Spasticity, extrapyramidal signs (e.g. choreoathetosis, dystonic attacks), <b>seizures</b> . Feeding difficulties, respiratory impairment. Typical MRI findings.                                                                                        | Birth-1st year         | PCH 2-4-5                                                                             |
| <i>AGTPBP1</i>                              | AR          | Early onset cerebellar atrophy, developmental arrest with progressive muscle weakness, and feeding and respiratory difficulties                                                                                                                                                                                   | 1st year               | Neurodegeneration, childhood-onset, with cerebellar atrophy                           |
| <i>TBCE</i>                                 | AR          | Hypotonia, developmental delay. Absent speech or dysarthria. Moderate to severe cognitive impairment. Distal weakness and wasting. Spastic tetraparesis. Ataxia (60%), optic atrophy (40%), scoliosis. Course: Progressive                                                                                        | Birth- 14 months       | Encephalopathy, progressive, with amyotrophy and optic atrophy                        |
| <i>TBCD</i>                                 | AR          | Developmental delay.. Proximal > Distal weakness. Respiratory involvement. Tongue fasciculations, microcephaly <b>seizures</b> , optic atrophy                                                                                                                                                                    | Congenital             | Encephalopathy, progressive, early-onset, with brain atrophy and thin corpus callosum |
| <i>TBCK</i>                                 | AR          | Hypotonia, severe psychomotor delay, feeding difficulties, progressive respiratory impairment, distinctive facial features                                                                                                                                                                                        | Birth-infancy          | Hypotonia, infantile, with psychomotor retardation and characteristic facies          |
| <i>SPTBN4</i>                               | AR          | Congenital hypotonia, profound weakness with areflexia, respiratory and feeding difficulties, and profound developmental delay with no language development. <b>Seizures</b> , cortical visual impairment and deafness. Can be associated with axonal or mixed sensory motor neuropathy.                          | Birth                  | Neurodevelopmental disorder with hypotonia, neuropathy, and deafness                  |
| <i>PLA2G6</i>                               | AR          | Neurocognitive regression, combination of pyramidal, extrapyramidal, and peripheral signs. Optic atrophy, nystagmus. <b>Brain MRI</b> : cerebellar atrophy, claval hypertrophy, iron in GP and SN.                                                                                                                | 6mo-3years             | Neurodegeneration with brain iron accumulation-2A                                     |
| <i>AIFM1</i>                                | X-linked    | SMA-like hypotonia and proximal weakness. Continuous involuntary movements in the hands and feet. Tongue fasciculations, muscle wasting. Absent DTR. <b>Seizures</b> . Neuro developmental delay. Progressive respiratory and feeding difficulties. <b>Brain MRI</b> : frontotemporal atrophy with a lactate peak | Birth- first months    | Combined oxidative phosphorylation deficiency, Also causes CMT4X                      |

at spectroscopy. High Lactate & Pyruvate in serum & CSF.  
Treatment with riboflavin!

**+ Predominant movement disorder/ dystonia**

|          |    |                                                                                                                                                                                                                                                                                                                                                               |                                         |                                                        |
|----------|----|---------------------------------------------------------------------------------------------------------------------------------------------------------------------------------------------------------------------------------------------------------------------------------------------------------------------------------------------------------------|-----------------------------------------|--------------------------------------------------------|
| SCP2     | AR | Dystonia, Hypergonadotropic hypogonadism, Azoospermia, Saccadic eye movements, Brisk reflexes in arms, diminished in legs, Intention tremor, ataxia, Hyposmia. MRI brain: hyperintensities in thalamus, "butterfly-like" lesions in pons, lesions in occipital regions                                                                                        | Childhood to Teens                      | Leukoencephalopathy with dystonia and motor neuropathy |
| HEXA     | AR | <b>TSD:</b> early onset, severe progressive. Blindness, 'cherry-red' spot on fundus examination. Usually fatal by the age of 2-3 years.<br><b>Juvenile:</b> Muscle atrophy, muscle cramping, fasciculations, proximal greater than distal weakness. Ataxia, dystonia, dysarthria. MRI brain: cerebellar atrophy. EMG/NCS: axonal sensorimotor polyneuropathy. | Infancy to late teens - Early adulthood | Tay-Sachs disease (TSD), Juvenile GM2-gangliosidosis   |
| C19orf12 | AR | Dysarthria, Spasticity, Dystonia, parkinsonism, progressive distal great than proximal weakness, optic atrophy, slow saccades, cognitive decline, psychiatric manifestations                                                                                                                                                                                  | 3-39 years                              |                                                        |

**+ Predominant spasticity/upper motor neuron**

|         |            |                                                                                                                           |                                    |                   |
|---------|------------|---------------------------------------------------------------------------------------------------------------------------|------------------------------------|-------------------|
| SPTLC1  | AD         | Spasticity followed by diffuse lower motor neurons involvement, tongue fasciculation, scoliosis, respiratory involvement  | Early-childhood to early adulthood | Juvenile ALS      |
| SPTLC2  | De novo/AD | Spasticity followed by diffuse lower motor neurons involvement, tongue fasciculation, dysphagia,, respiratory involvement | Neonatal to early childhood        | Juvenile ALS      |
| HNRNPA1 | AD         | Variable phenotype, from Juvenile ALS to HMN and distal myopathy                                                          |                                    | Juvenile ALS, HMN |

**+ Seizures**

|       |    |                                                                                                  |           |                             |
|-------|----|--------------------------------------------------------------------------------------------------|-----------|-----------------------------|
| ASAHI | AR | SMA-like with proximal weakness first in legs and then in arms. Later respiratory failure occurs | 3-5 years | SMA with myoclonic epilepsy |
|-------|----|--------------------------------------------------------------------------------------------------|-----------|-----------------------------|

**+ Early bulbar involvement**

|                     |               |                                                                                                                                                                                                                                                |                     |                                                                                  |
|---------------------|---------------|------------------------------------------------------------------------------------------------------------------------------------------------------------------------------------------------------------------------------------------------|---------------------|----------------------------------------------------------------------------------|
| SLC52A2 and SLC52A3 | AR, rarely AD | Progressive pontobulbar palsy, sensorineural hearing loss, axial and distal muscle weakness, optic atrophy, ataxia caused by sensory neuropathy, respiratory involvement.<br>Beneficial treatment with high-dose riboflavin (10 mg/kg per day) | Infancy -3rd decade | Brown-Vialetto-Van-Laere syndrome (BVVL) -Riboflavin Transporter Disorders (RTD) |
| SLC52A2 and SLC52A3 | AR or AD      | Progressive pontobulbar palsy, axial and distal muscle weakness, optic atrophy, ataxia caused by sensory neuropathy, respiratory involvement.<br><b>No</b> hearing loss. Beneficial treatment with high-dose riboflavin (10 mg/kg per day)     | Childhood           | Fazio-Londe syndrome - Riboflavin Transporter Disorders (RTD)                    |
| UBQLN1?             | AR            | Bulbar weakness<br>Vocal cord paralysis ± sensorineural hearing loss                                                                                                                                                                           | Juvenile            | Madras pattern Motor Neuron Disease (MMND)                                       |
| UBQLN2              | AR            | Progressive pontobulbar palsy + respiratory failure and upper motor neuron signs                                                                                                                                                               | Early adulthood     | Madras pattern Motor Neuron Disease (MMND)                                       |

**Supplementary Table 2. Summary of main early-onset neuropathies**

| Gene symbol                                           | OMIM ref       | Inheritance | Protein/Function                                                            | Salient or peculiar features                                                                                                                                                         | Age of onset                                                                   | Associated conditions                       |
|-------------------------------------------------------|----------------|-------------|-----------------------------------------------------------------------------|--------------------------------------------------------------------------------------------------------------------------------------------------------------------------------------|--------------------------------------------------------------------------------|---------------------------------------------|
| <b>Conditions with predominant distal involvement</b> |                |             |                                                                             |                                                                                                                                                                                      |                                                                                |                                             |
| <i>HSPB1</i>                                          | 608634         | AD/AR       | UPR; stabilization of microtubules?                                         | <i>Clinical:</i> lower limb predominance, slowly progressive, DTR absent or brisk. Neurophysiology: diffusively reduced CMAPS                                                        | Early adulthood, rarely in the 1 <sup>st</sup> decade (median 30y, range 4-66) | HMN2B, CMT2F                                |
| <i>HSPB8</i>                                          | 158590         | AD          | UPR                                                                         | <i>Clinical:</i> Possible onset with talipes + hip dislocation and delayed motor milestones. UL predominance possible. DTR brisk                                                     | Congenital to Adulthood                                                        | HMN2A, CMT2L                                |
| <i>HSPB3</i>                                          | 613376         | AD          | -                                                                           | <i>Clinical:</i> Asymmetric distal weakness                                                                                                                                          | 3 <sup>rd</sup> decade                                                         | HMN2C, CMT2                                 |
| <i>ATP7A</i>                                          | 300489         | X-linked    | Copper transport                                                            | <i>Clinical:</i> Distal-onset wasting and weakness. Early weakness of legs with slow progression; remain ambulatory. Pes cavus                                                       | 2-61y                                                                          | X-linked HMN (SMAX3)                        |
| <i>WARS</i>                                           | 617721         | AD          | tryptophanyl-tRNA synthetase                                                | <i>Clinical:</i> Slowly progressive distal weakness and atrophy in the feet, legs and hands                                                                                          | Juvenile onset (9-13y)                                                         | HMN9                                        |
| <i>FBXO38</i>                                         | 615575         | AD          | Transcriptional activator                                                   | <i>Clinical:</i> Calf-predominance                                                                                                                                                   | 13-48y                                                                         | HMN2D                                       |
| <i>DNAJB2</i>                                         | 614881         | AR          | Cochaperone                                                                 | <i>Clinical:</i> progressive distal weakness LL. Milder and later proximal LL weakness. UL mildly affected or spared                                                                 | 16-23y                                                                         | DSMA5                                       |
| <i>HINT1</i>                                          | 137200         | AR          | Purine phosphoramidase                                                      | <i>Clinical:</i> Distal weakness and atrophy LL and UL ± sensory involvement and neuromyotonia (absent in 20% of cases)                                                              | 1 <sup>st</sup> decade                                                         | HMN with neuromyotonia                      |
| <i>IGHMBP2</i>                                        | 604320         | AR          | Helicase                                                                    | <i>Clinical:</i> Either classic SMARD phenotype or milder cases with delayed motor milestones, distal weakness and only later (end of 1st decade) respiratory involvement            | Congenital to early childhood                                                  | HMN6/SMARD, CMT2S                           |
| <i>GARS</i>                                           | 600794         | AD          | Aminoacyl-tRNA synthetases. Disruption of the VEGF/Nrp1 signalling pathway? | <i>Clinical:</i> - 2nd decade onset, upper-limb predominance, - <2 y onset forms with LL>UL involvement, - Congenital onset SMARD-like with respiratory impairment, vocal cord palsy | 5-20 years, Congenital                                                         | CMT2D, HMN5A, SMARD like phenotype          |
| <i>REEP1</i>                                          | 614751         | AD          | ER-mitochondrial interactions                                               | <i>Clinical:</i> Preferential hand involvement (split sign) but also distal LL involvement and pes cavus                                                                             | 1st-2nd decade                                                                 | HMN5B, HSP31                                |
| <i>BSCL2</i>                                          | 619112         | AD          | UPR                                                                         | <i>Clinical:</i> Weak hands (thenar greater than first dorsal interosseous), Foot deformities, Peroneal weakness, brisk DTRs                                                         | Juvenile onset (median 15 y, range 4-40)                                       | HMN5C, Silver syndrome                      |
| <i>TRPV4</i>                                          | 600175, 181405 | AD          | Ion Channel – Possible disruption of mitochondrial axonal trafficking       | <i>Clinical:</i> talipes equinovarus, vocal cord palsy, progressive scoliosis; Respiratory involvement, hearing loss, and skeletal dysplasia present in <25%. MRI muscle:            | Congenital to childhood                                                        | HMN7, CMT2C, SPSMA, AMC, skeletal dysplasia |

|                                                             |                |        |                                                                                     |                                                                                                                                                                                                                                                                        |                                                                |                                     |
|-------------------------------------------------------------|----------------|--------|-------------------------------------------------------------------------------------|------------------------------------------------------------------------------------------------------------------------------------------------------------------------------------------------------------------------------------------------------------------------|----------------------------------------------------------------|-------------------------------------|
|                                                             |                |        |                                                                                     | preservation of biceps femoris and medial gastrocnemius                                                                                                                                                                                                                |                                                                |                                     |
| <b>SLC5A7</b>                                               | 158580         | AD     | Pre-synaptic choline transporter                                                    | <i>Clinical:</i> hand weakness and wasting (split-hand) and subsequent distal leg weakness. Vocal-cord paralysis                                                                                                                                                       | 11-16 y                                                        | HMN7A, CMS 20                       |
| <b>DCTN1</b>                                                | 607641         | AD     | Axonal transport along the microtubules                                             | <i>Clinical:</i> either vocal cord paralysis, facial and distal UL and LL weakness. Also, Congenital onset (talipes) slowly progressive. *Brisk reflexes                                                                                                               | From congenital to Early adulthood                             | HMN7B, Juvenile ALS, Perry Syndrome |
| <b>SIGMAR1</b>                                              | 605726         | AR     | ER Chaperone                                                                        | <i>Clinical:</i> Distal weakness and atrophy, LL first, then UL. Brisk DTR.                                                                                                                                                                                            | 1 <sup>st</sup> decade (6-12y)                                 | DSMA2, Juvenile ALS                 |
| <b>SETX</b>                                                 | 606002, 602433 | AR, AD | RNA and DNA helicase                                                                | <i>Clinical:</i> HMN + Pyramidal signs                                                                                                                                                                                                                                 | Juvenile                                                       | HMN + pyramidal                     |
| <b>AAAS</b>                                                 | 231550         | AR     | Nuclear protein import                                                              | <i>Clinical:</i> the typical triad of achalasia, alacrimia and adrenal insufficiency variably associated with motor neuropathy                                                                                                                                         | 1 <sup>st</sup> decade (1-10y)                                 | Triple A syndrome                   |
| <b>SORD</b>                                                 | 618912         | AR     | Oxidation of sorbitol to fructose                                                   | <i>Clinical:</i> distal weakness and atrophy, slowly progressive. Sensory involvement common                                                                                                                                                                           | Juvenile onset (rarely <10y)                                   | N/A                                 |
| <b>MFN2</b>                                                 | n/a            | AD     | Mitochondrial fusion                                                                | <i>Clinical:</i> might be associated with a phenotype similar to early onset HMN with predominant motor LL involvement (distal)                                                                                                                                        | 1 <sup>st</sup> decade                                         | CMT2A                               |
| <b>SMA-LED or neuropathies with early proximal weakness</b> |                |        |                                                                                     |                                                                                                                                                                                                                                                                        |                                                                |                                     |
| <b>DYNC1H1</b>                                              | 58600          | AD     | Axonal retrograde transport + other housekeeping functions                          | <i>Clinical:</i> proximal ≥distal LL weakness. Cognitive impairment, ADHD in ~1/3 of cases, MRI: Muscle involvement is peculiar (see text), CNS: polymicrogyria in >20% of cases                                                                                       | Congenital to adulthood                                        | SMALED1, HMN1, AMC, ID + MCD        |
| <b>BICD2</b>                                                | 615290, 618291 | AD     | Cargo adaptor protein, interact with dynein/kinesin complex. Localize Rab6 to Golgi | <i>Clinical:</i> phenotype usually similar to SMALED1, Respiratory involvement in up to 30%, MRI: brain abnormalities reported only in de novo cases                                                                                                                   | Congenital to adulthood                                        | SMALED2A, SMALED2B, AMC             |
| <b>SYT2</b>                                                 | 616040         | AD     | Ca <sup>++</sup> sensors for vesicular trafficking and exocytosis                   | <i>Clinical:</i> slowly progressive predominantly motor neuropathy, Cooccurrence of presynaptic NMJ dysfunction and LMN defect                                                                                                                                         | Childhood (second half of 1 <sup>st</sup> decade) to adulthood | Pre-synaptic CMS (AR)               |
| <b>PLEKHG5</b>                                              | 611067         | AR     | Nuclear factor kappa-B activator                                                    | <i>Clinical:</i> SMA3a like phenotype, progressive respiratory impairment                                                                                                                                                                                              | Childhood (2 - 11 years)                                       | CMT-RIC                             |
| <b>VWAI</b>                                                 | 619216         | AR     | ECM component                                                                       | <i>Clinical:</i> congenital <b>or</b> early onset feet deformities. Distal weakness (atrophy not common). Proximal weakness can be observed. Patellar and hip dislocation, MRI: peculiar pattern (see text), EMG and Muscle biopsy: mixed neurogenic/myopathic changes | 2 years-adulthood                                              | N/A                                 |

**Supplemental Table 3. Genes associated with neurogenic arthrogryposis**

| <b>Gene</b>    | <b>Inheritance</b> | <b>Protein/Function</b>                                                             | <b>Salient or peculiar features</b>                                                                                                                                      | <b>Disease</b>                                     |
|----------------|--------------------|-------------------------------------------------------------------------------------|--------------------------------------------------------------------------------------------------------------------------------------------------------------------------|----------------------------------------------------|
| <i>DYNC1H1</i> | AD                 | Axonal retrograde transport + other housekeeping functions                          |                                                                                                                                                                          | SMALED 1, HMNI, AMC, ID + MCD                      |
| <i>BICD2</i>   | AD                 | Cargo adaptor protein, interact with dynein/kinesin complex. Localize Rab6 to Golgi |                                                                                                                                                                          | SMALED2A, SMALED2B, AMC                            |
| <i>TRPV4</i>   | AD                 | Ion Channel – Possible disruption of mitochondrial axonal trafficking               |                                                                                                                                                                          | HMN7, CMT2C, SPSMA, AMC, skeletal dysplasia        |
| <i>ECEL1</i>   | AR                 | Zinc metalloproteases                                                               | Distal arthrogryposis, ulnar deviation, respiratory impairment in some patients                                                                                          | Arthrogryposis, Distal, Type 5d                    |
| <i>UBE1</i>    | X-linked           | Ubiquitin activating enzyme                                                         | Pattern of weakness similar to classic SMA, Proximal and finger contractures. Myopathic facies, Respiratory insufficiency, Dysmorphic features<br>Death < 2 years of age | SMAX2                                              |
| <i>GLE1</i>    | AR                 | Nuclear trafficking and gene expression regulator                                   | Severe phenotype with respiratory and bulbar impairment + pyramidal and extrapyramidal signs and premature death. 3 patients reported with “milder” phenotype            | Lethal congenital contracture syndrome I           |
| <i>ERBB3</i>   | AR                 | Epidermal growth factor receptor tyrosine kinase                                    | AMC + gut dysmotility                                                                                                                                                    | Autosomal recessive familial visceral neuropathy I |
| <i>ERGIC1</i>  | AR                 | Transport between ER and Golgi                                                      | Neurogenic AMC (flexion elbows and knees + equinovarus). Not evolving                                                                                                    |                                                    |
| <i>SMN1</i>    | AR                 | Housekeeping                                                                        | Severe forms of SMA                                                                                                                                                      | SMA type 0                                         |
